# Supplementary material for: Detailed modeling of positive selection improves detection of cancer driver genes
Source: PubMed Central journal article supplement (PMC6667447; doi:10.1038/s41467-019-11284-9), 2019-07-30
Supplement: 41467_2019_11284_MOESM3_ESM.pdf [file 41467_2019_11284_MOESM3_ESM.pdf]

## **Description of Additional Supplementary Files**

File Name: Supplementary Data 1

Description: Parameter estimation results for modeling spatial effect (HMM) for OGs

File Name: Supplementary Data 2

Description: Gene function for novel significant genes from breast, lung and prostate cancers

File Name: Supplementary Data 3

Description: Genes found by loss-of-function screening affecting cell growth
