# Supplementary material for: Detailed modeling of positive selection improves detection of cancer driver genes
Source: Nat Commun. 2019 Jul 30;10:3399. doi: 10.1038/s41467-019-11284-9 (PMC6667447; doi:10.1038/s41467-019-11284-9)
Supplement: Supplementary file 8 — Source Data [file 41467_2019_11284_MOESM8_ESM.xlsx]

## Sheet: Sheet1
	Figure 6c									Figure S7a
	siControl	siMETTL3	siMETTL3/Control	siMETTL3/METTL3	siMETTL3/METTL3(E532X)	siMETTL3/METTL3(E516K)	siMETTL3/METTL3(P514T)			siControl	siMETTL3	siMETTL3/Control	siMETTL3/METTL3	siMETTL3/METTL3E532X	siMETTL3/METTL3E516K	siMETTL3/METTL3P514T
	0.46	0.32	0.35	0.44	0.32	0.38	0.33			0.42	0.3	0.28	0.42	0.3	0.35	0.37
	0.43	0.35	0.37	0.42	0.38	0.4	0.32			0.38	0.27	0.31	0.45	0.35	0.36	0.33
	0.42	0.31	0.32	0.45	0.35	0.35	0.36			0.45	0.32	0.35	0.39	0.31	0.32	0.36
	Figure 6d
	Time(hours)	siControl	Error bar	siMETTL3	Error bar	siMETTL3/Control	Error bar	siMETTL3/METTL3	Error bar	siMETTL3/METTL3(E532X)	Error bar	siMETTL3/METTL3(E516K)	Error bar	siMETTL3/METTL3(P514T)	Error bar
	24	1	0.05	1	0.06	1	0.07	1	0.072	1	0.04	1	0.08	1	0.05
	48	1.557	0.07785	1.89	0.1134	2.08	0.1456	1.62	0.11664	2.79	0.1116	2.09	0.1672	2.78	0.139
	72	2.73	0.1365	4.32	0.2592	4.29	0.3003	2.82	0.20304	5.05	0.202	5.46	0.4368	4.29	0.2145
	Figure S7b
	Time(hours)	siControl	Error bar	siMETTL3	Error bar	siMETTL3/Control	Error bar	siMETTL3/METTL3	Error bar	siMETTL3/METTL3(E532X)	Error bar	siMETTL3/METTL3(E516K)	Error bar	siMETTL3/METTL3(P514T)	Error bar
	24	1	0.05	1	0.06	1	0.07	1	0.055	1	0.062	1	0.072	1	0.04
	48	1.24	0.062	1.9	0.114	1.58	0.1106	1.38	0.0759	1.76	0.10912	1.59	0.11448	1.64	0.0656
	72	2.05	0.1025	2.83	0.1698	2.98	0.2086	2.18	0.1199	2.58	0.15996	2.88	0.20736	2.95	0.118

## Sheet: gel image
For Supplementary figure 6.
